# Supplementary material for: QTL Mapping And Candidate Gene Mining of Flag Leaf Size Traits In Japonica Rice Based On Linkage Mapping And Genome-Wide Association Study
Source: Research Square preprint supplement (doi:10.21203/rs.3.rs-866138/v1), 2021-09-16
Supplement: Supplementary file 1 [file a3a15c465440ca0c71ab5cb8.xlsx]

## Sheet: S1
Table S1 Primers for qRT-PCR in this study
Gene accession	Forward primers (5'-3')	Reverse primers (5'-3')
LOC_Os02g54254	GCGAATGGAGCAGAGAAT	GCGTGTCAGTAATGGTTATC
LOC_Os02g54550	ACTCTACCTCCGCTTGTT	TCCTTGTGAATCTTGTCCAA
LOC_Os10g20160	TGTCCTTCTTGGCTTCCT	CCGTTGGTTGTGGTGTTA
LOC_Os10g20240	ATTACATCTGCTGGTGACAT	ACATTGGCTTAGAACATTGC
LOC_Os10g20260	AGAGGACGAGAGGAGGAA	CTGTAAGTAAGTGAGGAGGAG
Actin1	TGGCATCTCTCAGCACATTCC	TGCACAATGGATGGGTCAGA

## Sheet: S2
Table S2. Phenotype of flag leaf size traits of RILsA and RILsB in 2019 and 2020
Traits	RILs	Year	Parents		RILs
			K131/Caidao(cm)	HDB/WD20342(cm)	Mean(cm)	SD	Range(cm)	Skewness	Kurtosis
FL	RILA	2019	23.86	45.52	33.56	4.38	20.44-43.50	0.39	0.2
		2020	24.11	46.35	31.1	4.65	19.88-43.84	0.57	0.17
	RILB	2019	31.68	52.96	39.22	5.07	23.56-62.40	0.88	0.68
		2020	31.94	53.22	37.37	5.62	22.13-60.56	0.51	1.35
FW	RILA	2019	1.34	1.88	1.54	0.45	1.10-2.15	0.52	0.11
		2020	1.38	1.91	1.51	0.17	1.10-2.00	0.34	0.06
	RILB	2019	1.56	2.04	1.58	1.44	1.00-3.68	1.96	2.73
		2020	1.58	2.11	1.56	0.22	1.02-3.66	1.36	3.55
FLA	RILA	2019	29.86	41.25	35.56	6.57	18.20-61.13	0.87	0.65
		2020	30.14	42.33	35.26	7.25	18.79-60.63	0.52	0.44
	RILB	2019	35.78	51.78	43.01	5.55	21.49-77.58	0.96	0.91
		2020	36.17	51.96	43.83	5.68	21.99-79.82	0.71	1.49
FL: Flag leaf length; FW: Flag leaf width; FLA Flag leaf area

## Sheet: S3
Table S3. Phenotype of flag leaf size traits for natural population in 2019 and 2020
Traits	Year	Natural population
		Mean(cm)	SD	Range(cm)	Skewness	Kurtosis
FL	2019	30.96	6.78	22.20-45.20	0.42	0.57
	2020	29.43	7.29	20.20-45.60	1.87	1.43
FW	2019	1.48	0.19	1.00-2.44	0.91	3.32
	2020	1.37	0.23	0.94-2.86	1.97	2.82
FLA	2019	34.19	6.99	17.32-64.80	0.79	1.07
	2020	30.35	7.55	15.12-64.35	1.26	3.1
FL: Flag leaf length; FW: Flag leaf width; FLA Flag leaf area

## Sheet: S4
Table S4 QTL analysis of traits related to flag leaf size for RILs in 2019 and 2020
Traits	Year	RILs	QTLs	Chr.	Marker interval	LOD	PVE(%)	Add	Known genes/QTLs
FL	2019	RILsA	qFLr6-2	6	C6_21982694 - C6_22113949	3.51	7.38	-4.13	qFLL6
			qFLr7-2	7	C7_6259359 - C7_8809828	2.94	8.99	-4.82
		RILsB	qFLr3	3	C3_28793586 - C333130038	2.51	8.94	-3.28
			qFLr6-3	6	C6_23820023 - C6_23911554	2.64	8.25	-4.56
			qFLr7-1	7	C7_5209225 - C7_7549486	3.07	7.37	3.78
	2020	RILsA	qFLr6-1	6	C6_7105144 - C6_8622210	3.61	4.97	-1.19
			qFLr7-2	7	C7_6259359 - C7_8809828	8.26	13.65	-2.06
			qFLr11-1	11	C11_1609876 - C11_4416248	3.15	5.77	-1.82
		RILsB	qFLr1	1	C1_34290239 - C1_35034405	4.54	8.8	1.8	qFLL1.2
			qFLr3	3	C3_28793586 - C3_33130038	3.66	6.17	9.3
			qFLr11-2	11	C11_18637236 - C11_18825608	3.46	7.103	-1.52
FW	2019	RILsA	qFWr2-3	2	C2_33142844 - C2_35004908	4.65	9.46	-5.01
			qFWr4-1	4	C4_11082255 - C4_12094771	2.66	5.51	3.56
			qFWr11	11	C11_7125063 - C11_7460037	2.7	8.76	1.88
		RILsB	qFWr2-1	2	C2_4576909 - C2_4954872	3.25	11.5	-3.32
			qFWr10	10	C10_9054066 - C10_10570732	2.86	11.26	1.05
	2020	RILsA	qFWr2-3	2	C2_33142844 - C2_35004908	2.52	7.27	-1.03
			qFWr4-3	4	C4_30976306 - C4_31027329	4.19	20.88	1.09
		RILsB	qFWr2-1	2	C2_4576909 - C2_4954872	4.01	8.65	-2.07
			qFWr4-2	4	C4_30962619 - C4_31524314	4.59	9.89	1.07
			qFWr10	10	C10_9054066 - C10_10570732	2.59	8.15	1.64
FLA	2019	RILsA	qFLAr3-1	3	C3_799346 - C3_1493308	5.96	12.5	-7.14	qLA3-1
			qFLAr6-2	6	C6_15028785 - C6_15028791	2.84	9.58	3.29
		RILsB	qFLAr4-1	4	C4_22842238 - C4_23367176	3.01	10.07	2.85
			qFLAr4-2	4	C4_30375730 - C4_30510472	2.85	9.33	2.61
			qFLAr7-2	7	C7_16989589 - C7_17910486	4.54	10.24	3.88
	2020	RILsA	qFLAr4-4	4	C4_31027329 - C4_31239200	6.81	19.74	1.09	NAL1
			qFLAr6-1	6	C6_7105144 - C6_8622210	3.13	4.99	-1.4
			qFLAr7-1	7	C7_8809828 - C7_13201476	4.91	9.38	-2.4
		RILsB	qFLAr3-2	3	C3_28793586 - C3_33130038	4.17	11.2	-1.9
			qFLAr4-2	4	C4_30375730 - C4_30510472	4.03	5.66	2.57
			qFLAr11-2	11	C11_18984622 - C11_19084571	3.75	5.31	-2.44

## Sheet: S5
Table S5 Functional annotation of the genes in the candidate region of qFL2
Geneaccession	Functional annotation
LOC_Os02g 54160	AP2/ERF transcription factor, Defense response, Abiotic stress response; Similar to Transcription factor EREBP1
LOC_Os02g 54180	expressed protein
LOC_Os02g 54190	pectinesterase, putative, expressed
LOC_Os02g 54200	mitochondrial transcription termination factor family protein, putative, expressed
LOC_Os02g 54210	retrotransposon protein, putative, unclassified, expressed
LOC_Os02g 54220	retrotransposon protein, putative, unclassified, expressed
LOC_Os02g 54230	expressed protein
LOC_Os02g 54240	OsFBX62 - F-box domain containing protein, expressed
LOC_Os02g 54254	saccharopine dehydrogenase, putative, expressed
LOC_Os02g 54270	retrotransposon protein, putative, unclassified, expressed
LOC_Os02g 54280	retrotransposon protein, putative, unclassified, expressed
LOC_Os02g 54290	BRUSHY 1, putative, expressed
LOC_Os02g 54300	expressed protein
LOC_Os02g 54310	expressed protein
LOC_Os02g 54320	retrotransposon protein, putative, unclassified, expressed
LOC_Os02g 54330	OsFBDUF14 - F-box and DUF domain containing protein, expressed
LOC_Os02g 54340	26S protease regulatory subunit 7, putative, expressed
LOC_Os02g 54350	hypothetical protein
LOC_Os02g 54360	enzyme of the cupin superfamily protein, putative, expressed
LOC_Os02g 54370	hypro1, putative, expressed
LOC_Os02g 54390	hypro1, putative, expressed
LOC_Os02g 54400	transposon protein, putative, CACTA, En/Spm sub-class, expressed
LOC_Os02g 54410	transposon protein, putative, CACTA, En/Spm sub-class, expressed
LOC_Os02g 54420	hypro1, putative, expressed
LOC_Os02g 54430	transposon protein, putative, Pong sub-class, expressed
LOC_Os02g 54440	transposon protein, putative, Pong sub-class, expressed
LOC_Os02g 54450	hypro1, putative, expressed
LOC_Os02g 54460	expressed protein
LOC_Os02g 54470	60S ribosomal protein L35a-3, putative, expressed
LOC_Os02g 54480	RNA-directed DNA polymerase, putative, expressed
LOC_Os02g 54490	nucleotide binding protein, putative, expressed
LOC_Os02g 54500	WD40-like, putative, expressed
LOC_Os02g 54510	protein kinase domain containing protein, expressed
LOC_Os02g 54520	MYB family transcription factor, putative, expressed
LOC_Os02g 54530	SCP-like extracellular protein, expressed
LOC_Os02g 54540	SCP-like extracellular protein, expressed
LOC_Os02g 54550	OsFBX63 - F-box domain containing protein, expressed

## Sheet: S6
Table S6 Functional annotation of the genes in the candidate region of qFL10
Geneaccession	Functional annotation
LOC_Os10g20160	serine/threonine-protein kinase receptor precursor, putative, expressed
LOC_Os10g20170	retrotransposon protein, putative, unclassified, expressed
LOC_Os10g20180	retrotransposon protein, putative, unclassified, expressed
LOC_Os10g20190	retrotransposon protein, putative, Ty3-gypsy subclass, expressed
LOC_Os10g20200	retrotransposon protein, putative, unclassified
LOC_Os10g20210	retrotransposon protein, putative, unclassified
LOC_Os10g20220	retrotransposon protein, putative, unclassified, expressed
LOC_Os10g20230	expressed protein
LOC_Os10g20235	expressed protein
LOC_Os10g20240	syntaxin 6, N-terminal domain containing protein, expressed
LOC_Os10g20250	membrane associated DUF588 domain containing protein, putative, expressed
LOC_Os10g20260	cellulose synthase family protein, expressed
LOC_Os10g20280	transposon protein, putative, CACTA, En/Spm sub-class, expressed
LOC_Os10g20290	expressed protein
LOC_Os10g20300	expressed protein
